# Supplementary material for: Structural and conformational study of two solvates of a fulgenic acid derivative
Source: Royal Society of Chemistry journal article supplement (doi:10.1039/b515266f), 2006-01-01

## ELECTRONIC SUPPLEMENTARY INFORMATION

### Structural and conformational study of two solvates of a fulgenic acid derivative

Valerio Giannellini, Massimo Bambagiotti-Alberti, Bruno Bruni, Massimo Di Vaira

#### A1

Two views of the optimised geometry of model A with the arrangement of carboxylic groups yielding lowest energy. Global energy minimum, ZPE-corrected energy value:

$E = -533.025785$  Hartrees (a.u.).

O2 ... O3 distance: 2.994 Å. Value of dihedral angle  $\delta = 55.0^\circ$  (the  $\delta$  angle, defined in the text, is formed by atoms of the butadienic chain).

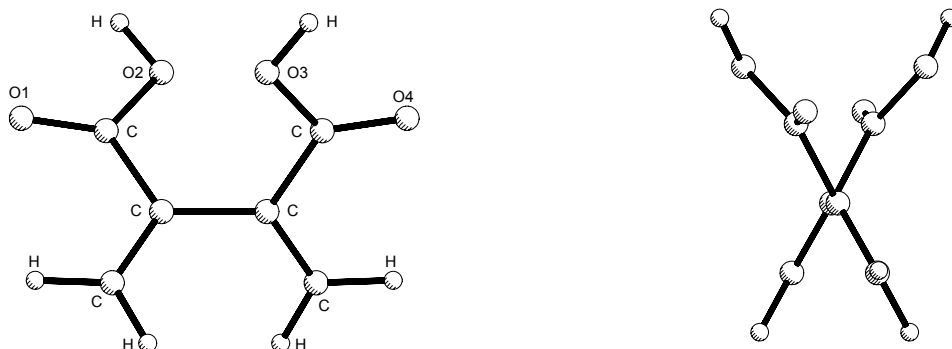

#### A2

Optimised geometry of model A, with alternative arrangement of carboxylic groups with respect to that of A1.  $E = -533.025484$  a.u., 0.19 kcal mol<sup>-1</sup> above A1.

Closest O ... O approach: 3.017 Å.  $\delta$  dihedral angle: 52.2°.

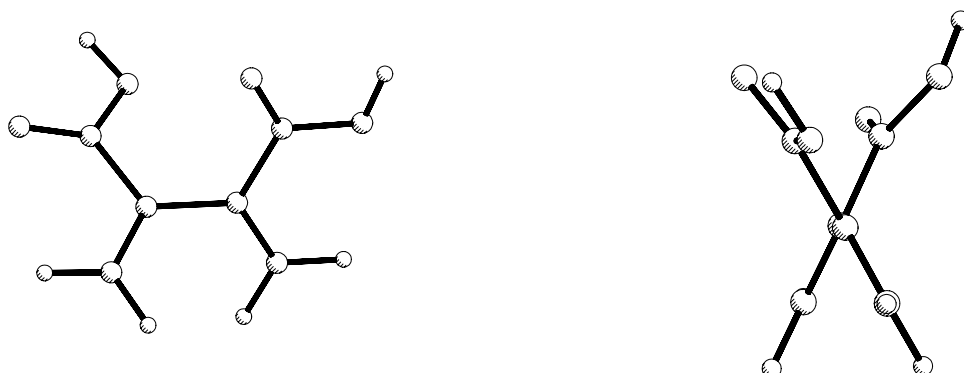

### A3

Optimised model A geometry with the third type of carboxyls arrangement.

$E = -533.025107$  a.u.,  $0.43$  kcal mol<sup>-1</sup> above A1.

Closest O ... O approach:  $3.090$  Å.  $\delta$  dihedral angle:  $50.0^\circ$ .

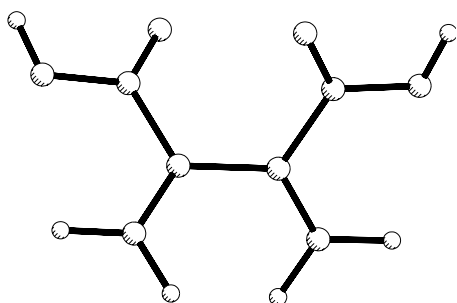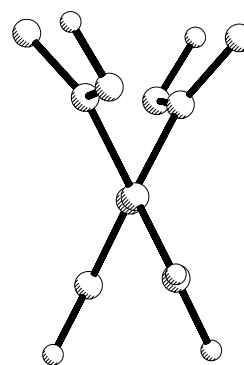

### A4

Model A with intramolecular hydrogen bond.  $E = -533.022771$  a.u.,  $1.89$  kcal mol<sup>-1</sup> above A1, or  $1.70$  kcal mol<sup>-1</sup> above the energy of the more directly related A2 arrangement.

O ... O distance  $2.671$  Å.  $\delta = 55.5^\circ$ .

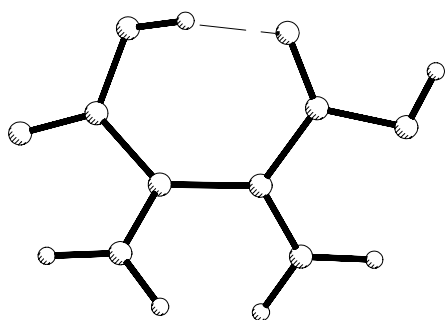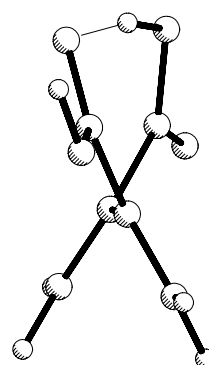

## A5

Relative minimum energy geometry of model A, reached from A1 through rotation around the  $C_{\alpha}$ - $C_{\alpha'}$  bond.  $E = -533.022207$  a.u.,  $2.25$  kcal mol $^{-1}$  above A1.  $\delta = 136.2^{\circ}$ .

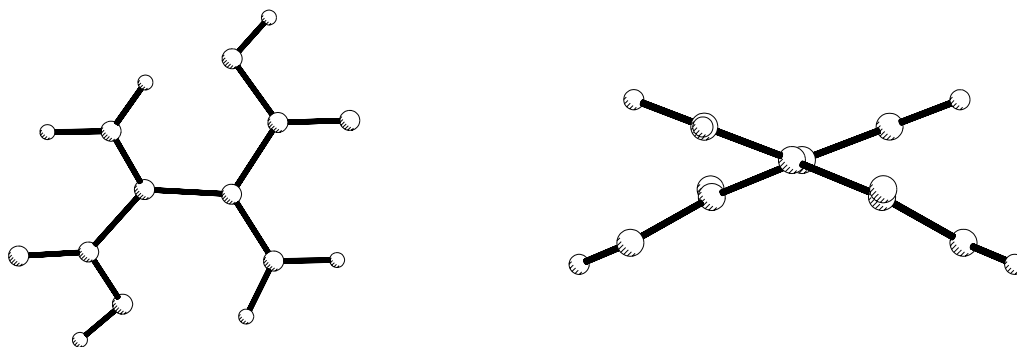

## A6

Geometry at the transition state along the path between minima A1 and A5, connected by rotation around the  $C_{\alpha}$ - $C_{\alpha'}$  bond.  $E = -533.022024$  a.u.,  $2.36$  kcal mol $^{-1}$  above A1.  $\delta = 111.1^{\circ}$ .

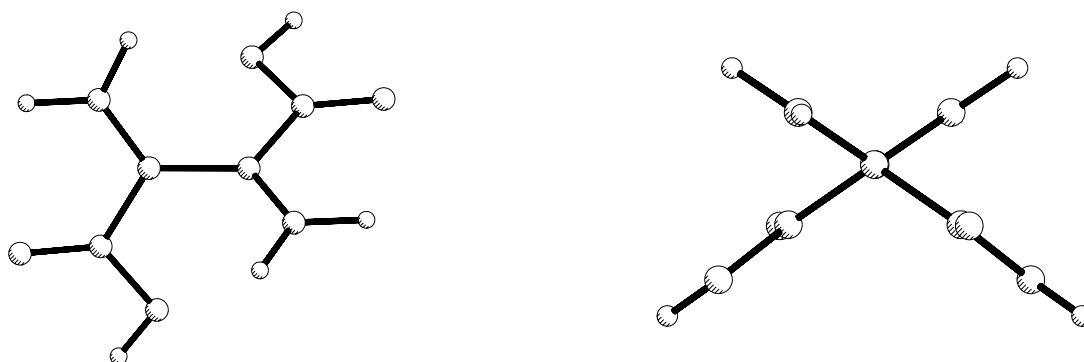

## A7

Geometry at one of the transition states of model A, for rotation of a carboxylic group around its C- C $_{\alpha}$  bond. E = -533.013906 a.u., 7.45 kcal mol $^{-1}$  above A1.  $\delta = 59.9^{\circ}$ .

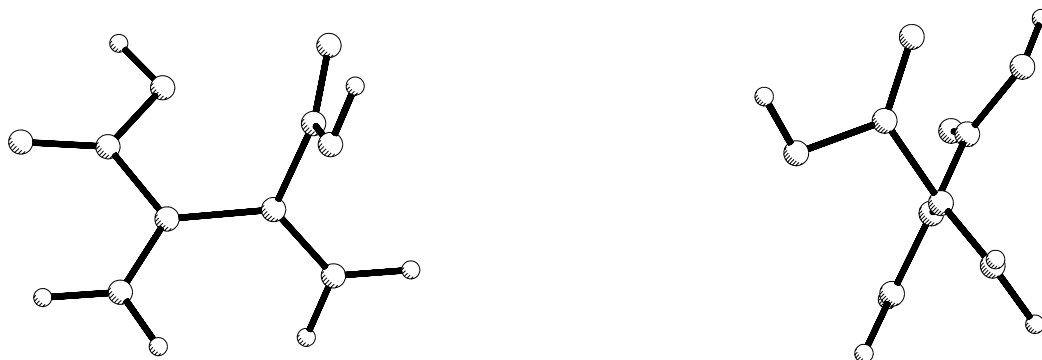

## A8

Geometry at one of the transition states (alternative path with respect to that of A7) of model A, for rotation of a carboxylic group around its C- C $_{\alpha}$  bond. E = -533.013034 a.u., 8.00 kcal mol $^{-1}$  above A1.  $\delta = 59.8^{\circ}$ .

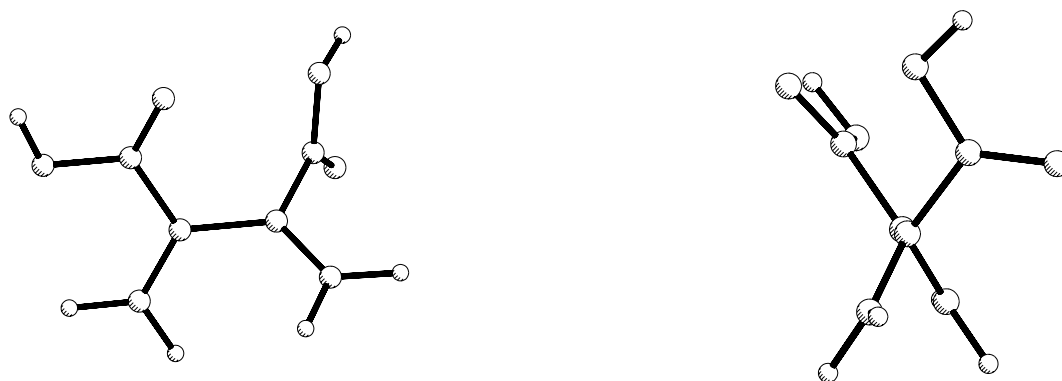

## B1

Geometry at the global energy minimum of model B: should be compared with those in Figures 1 and 3 of the text.  $E = -994.993914$  a.u. (non ZPE-corrected value  $-995.273239$  a.u., for further reference). Closest O ... O approach:  $3.732 \text{ \AA}$ .  $\delta = 109.8^\circ$ .

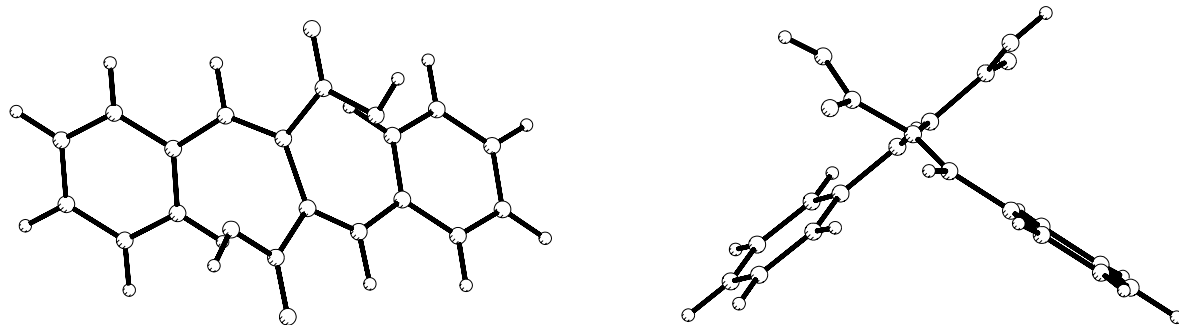

## B2

Relative minimum energy geometry of model B, differing from that of B1 in the arrangement of the carboxylic hydrogens.  $E = -994.992196$  a.u.,  $1.08 \text{ kcal mol}^{-1}$  above the energy of B1. Closest O ... O approach:  $3.851 \text{ \AA}$ .  $\delta = 113.3^\circ$ .

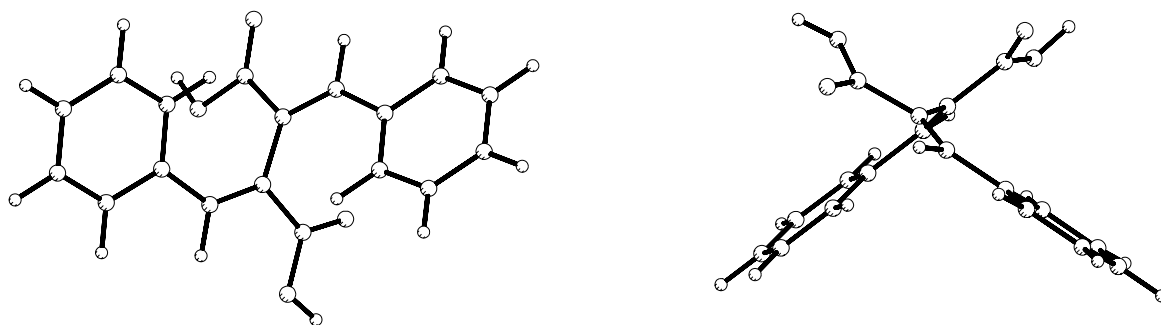

### B3

Transition state geometry for the process of rotation of a phenyl group around the  $C_{\beta}$ - $C_{\gamma}$  bond in model B (labels of carbon atoms are given in the Scheme in the text).  $E = -994.987204$  a.u.,  $4.21 \text{ kcal mol}^{-1}$  above the energy of B1, and  $3.31 \text{ kcal mol}^{-1}$  above that of B2, to which the geometry of the TS B3 is more closely related.  $|\delta| = 96.3^{\circ}$ .

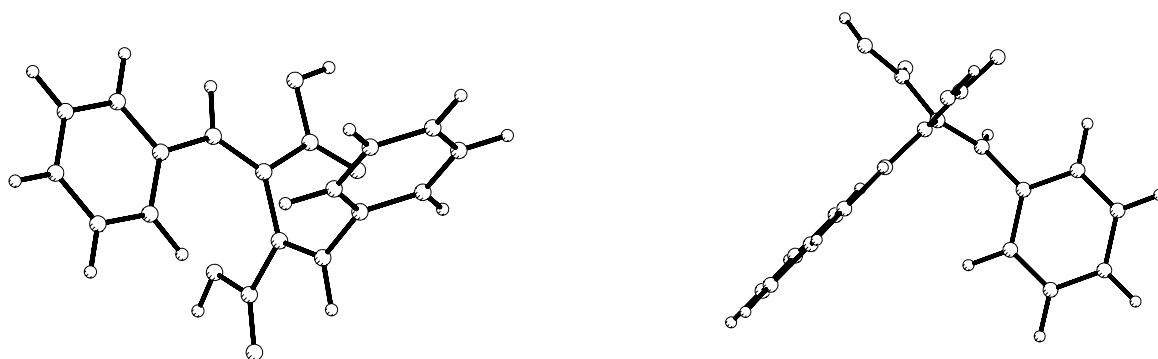

### B4

Transition state geometry for the process of rotation of a carboxylic group around its  $C$ - $C_{\alpha}$  bond in model B.  $E = -994.982042$  a.u.,  $7.45 \text{ kcal mol}^{-1}$  above the energy of B1.  $\delta = 87.9^{\circ}$ .

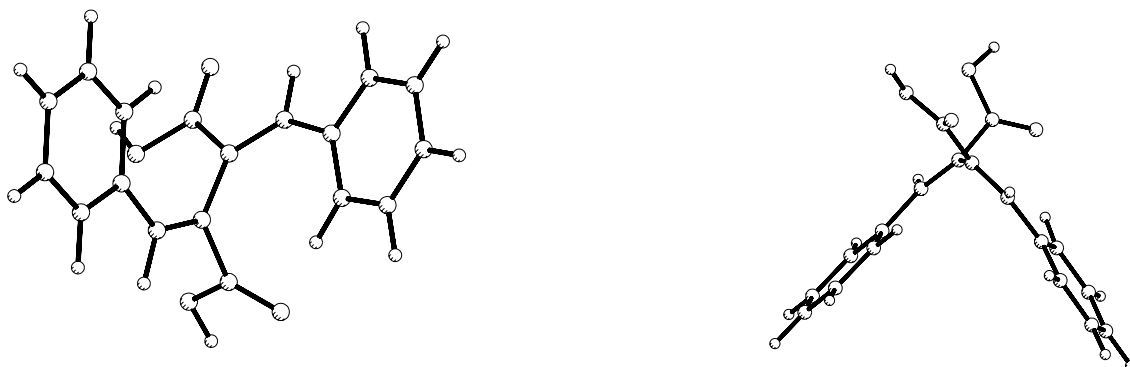

## B5

Conformation attained at  $\delta = 50.0^\circ$  by the model molecule B, along a path of restrained geometry optimisations at fixed values of the dihedral angle  $\delta$ , corresponding to rotation around the  $C_\alpha-C_{\alpha'}$  bond. The appreciable departure from planarity of each half part of the molecule may be noticed.  $E = -995.26976$  a.u.,  $2.2 \text{ kcal mol}^{-1}$  above the non ZPE-corrected energy of B1. This and following energy values for B are not corrected for ZPE, whose value is not available for restrained optimisations.

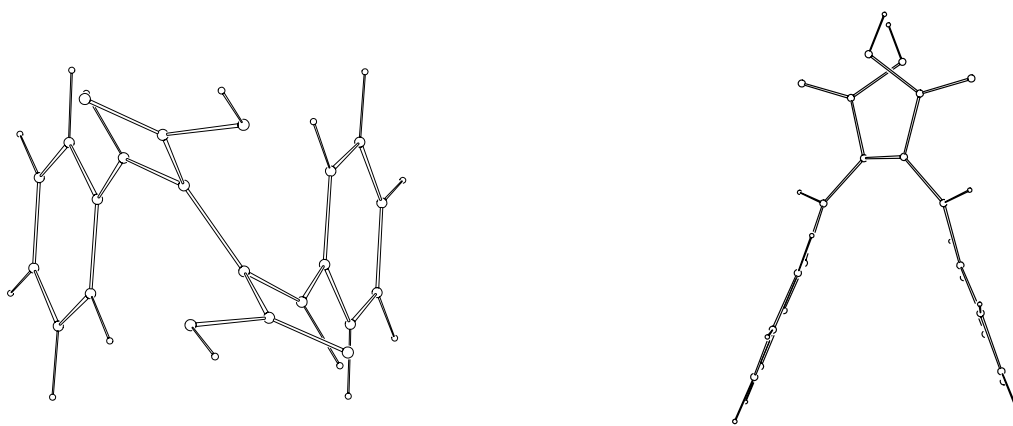

## B6

Two views of the geometry of model B in proximity of the saddle point along the  $-\delta$  path of restrained geometry optimisations, performed by rotation about the  $C_\alpha-C_{\alpha'}$  bond for decreasing values of the  $\delta$  hinge angle.  $E = -995.22401$  a.u.,  $30.9 \text{ kcal mol}^{-1}$  above the ZPE-uncorrected energy of B1.  $\delta = -40^\circ$ .

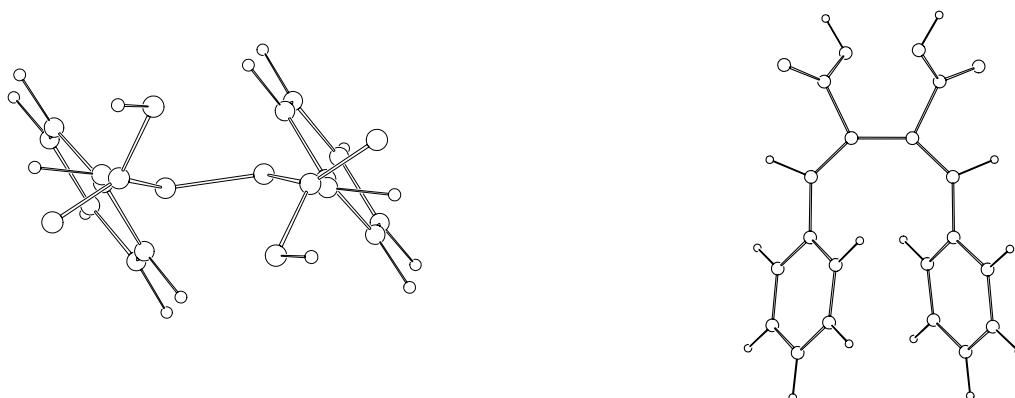

## B7

Two views of the geometry of model B in proximity of the saddle point along the  $+\delta$  path of restrained geometry optimisations, performed applying rotations about the  $C_{\alpha}-C_{\alpha'}$  bond for increasing values of the  $\delta$  hinge angle.  $E = -995.24155$  a.u.,  $19.9$  kcal mol $^{-1}$  above the ZPE-uncorrected energy of B1.  $\delta = 200^{\circ}$  (or  $-160^{\circ}$ ).

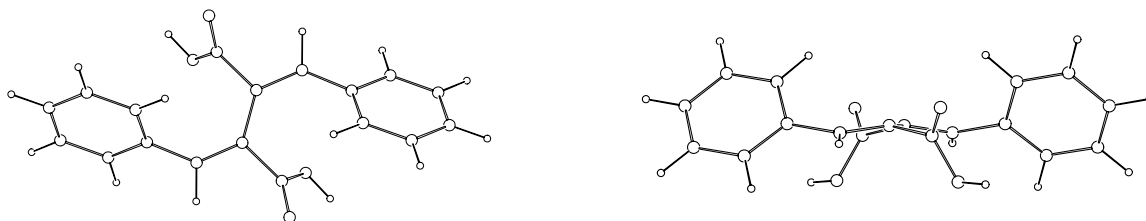

## C1

Geometry at the global energy minimum of model C, to be compared with the geometry of B1 and those in Figures 1 and 3 of the text.  $E = -1452.959434$  a.u. (non ZPE-corrected value for later reference:  $-1453.369691$  a.u.). Closest O ... O approach:  $3.748$  Å.  $\delta = 113.6^{\circ}$ .

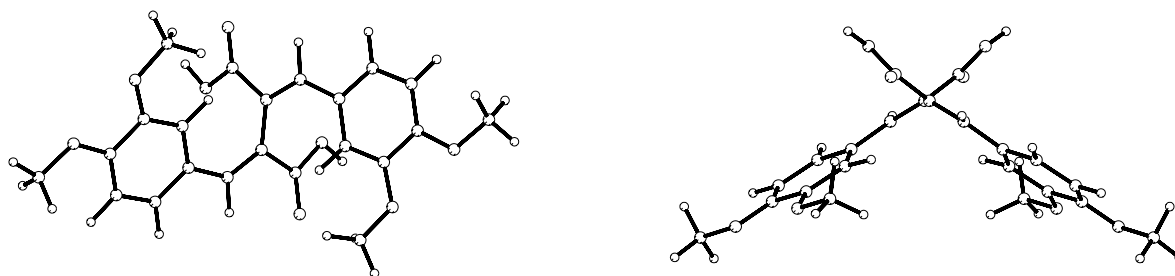



## C2

Model C with intramolecular hydrogen bond.  $E = -1452.956933$  a.u.,  $1.57$  kcal mol<sup>-1</sup> above the energy of C1. O ... O distance  $2.746$  Å.  $\delta = 84.1^\circ$ .

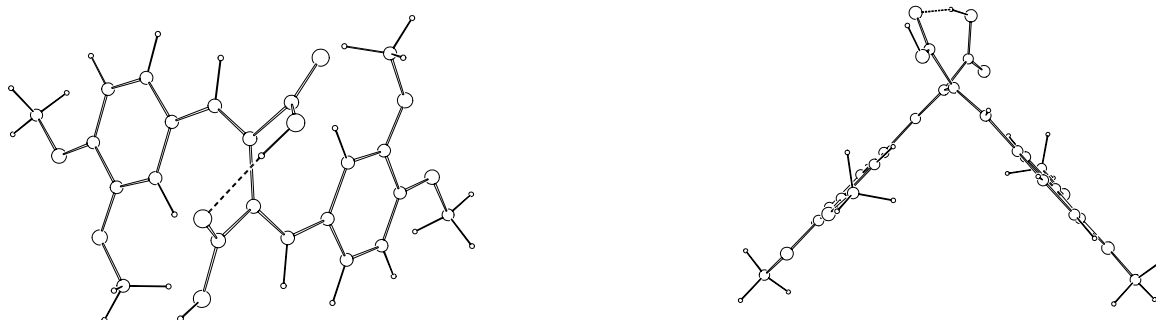

## C3

Transition state geometry for the process of rotation of a phenyl group around the C<sub>β</sub>-C<sub>γ</sub> bond in model C (labels of carbon atoms as in the Scheme in the text).  $E = -1452.949913$  a.u.,  $5.97$  kcal mol<sup>-1</sup> above the energy of C1.  $\delta = 94.0^\circ$ .

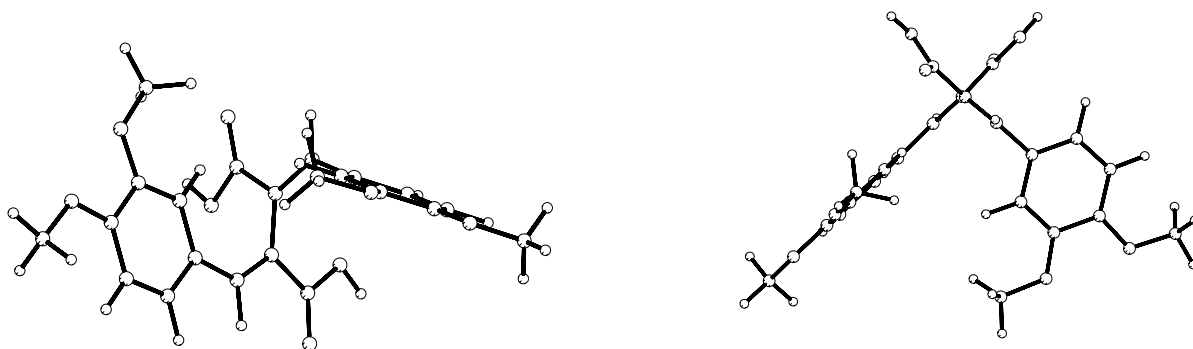

## C4

Conformation attained at  $\delta = 50.0^\circ$  by model C, along a path of restrained geometry optimisations at fixed values of the dihedral angle  $\delta$ , corresponding to rotation around the  $C_\alpha-C_{\alpha'}$  bond. As for B (B5), partial loss of planarity in the two parts of the molecule (cinnamic backbones) is evident.  $E = -1453.364254$  a.u.,  $3.4 \text{ kcal mol}^{-1}$  above the ZPE-uncorrected energy of C1.

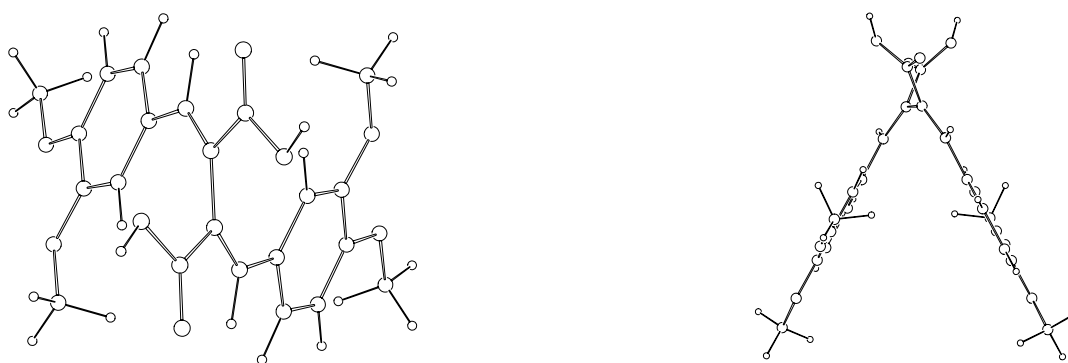

## C5

Two views of the geometry of model C in proximity of the saddle point along the  $-\delta$  path of restrained geometry optimisations, performed by rotation about the  $C_\alpha-C_{\alpha'}$  bond for decreasing values of the  $\delta$  hinge angle.  $E = -1453.315554$  a.u.,  $34.0 \text{ kcal mol}^{-1}$  above the ZPE-uncorrected energy of C1.  $\delta = -40^\circ$ .

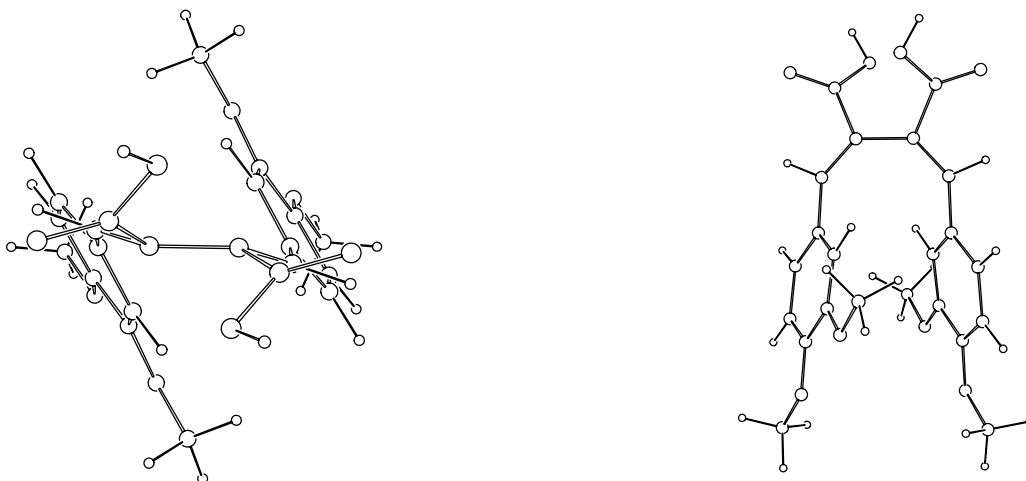

## C6

Two views of the geometry of model C in proximity of the saddle point along the  $+\delta$  path of constrained geometry optimisations, performed applying rotations about the  $C_{\alpha}-C_{\alpha'}$  bond for increasing values of the  $\delta$  hinge angle.  $E = -1453.330813$  a.u.,  $24.3 \text{ kcal mol}^{-1}$  above the ZPE-uncorrected energy of C1.  $\delta = 210^{\circ}$  (or  $-150^{\circ}$ ).

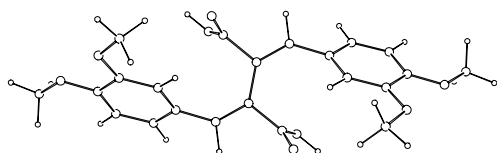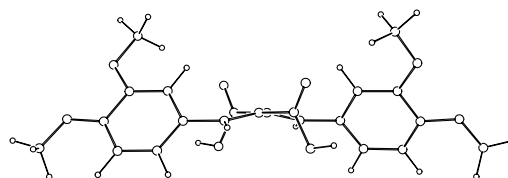

Supplement: b515266f.pdf [file b515266f.pdf]
